1       **TREND, POPULATION STRUCTURE AND TRAIT MAPPING**  
2       **FROM 15 YEARS OF NATIONAL VARIETAL TRIALS OF UK**  
3       **WINTER WHEAT.**

4       **Oluwaseyi Shorinola<sup>\*†</sup>, James Simmonds<sup>\*</sup>, Luzie U. Wingen<sup>\*</sup>, Keith Gardner<sup>‡</sup>,**  
5       **Cristobal Uauy<sup>\*</sup>**

6       <sup>\*</sup> John Innes Centre, Norwich Research Park, Norwich UK, NR4 7UH.

7       <sup>†</sup>Bioscience eastern and central Africa – International Livestock Research Institute  
8       (BecA-ILRI), Nairobi, 00100, Kenya.

9       <sup>‡</sup>National Institute of Agricultural Botany, 93 Lawrence Weaver Road, Cambridge UK,  
10       CB3 0LE.

11

12

13

14

15

16

17

18 **Running Title:** Fifteen years of UK Wheat breeding.

19 **Corresponding Author:** Oluwaseyi Shorinola, John Innes Centre, Norwich Research

20 Park, Norwich UK, NR4 7UH, [Oluwaseyi.shorinola@jic.ac.uk](mailto:Oluwaseyi.shorinola@jic.ac.uk), [o.shorinola@cgiar.org](mailto:o.shorinola@cgiar.org).

21 **Keywords:** Wheat, SNP, GWAS, *NAM-A1*, Trend Analysis.

22

23

24

25

26

27

28

29

30

31

32

33

34

35

## ABSTRACT

36 There are now a rich variety of genomic and genotypic resources available to wheat  
37 researchers and breeders. However, the generation of high-quality and field-relevant  
38 phenotyping data which is required to capture the complexities of gene x environment  
39 interactions remains a major bottleneck. Historical datasets from national variety  
40 performance trials (NVPT) provide sufficient dimensions, in terms of numbers of years  
41 and locations, to examine phenotypic trends and study gene x environment interactions.  
42 Using NVPT for winter wheat varieties grown in the UK between 2002 – 2017, we  
43 examined temporal trends for eight traits related to yield, adaptation, and grain quality  
44 performance. We show a non-stationary linear trend for yield, grain protein content,  
45 HFN and days to ripening. Our data also show high environmental stability for yield,  
46 grain protein content and specific weight in UK winter wheat varieties and high  
47 environmental sensitivity for Hagberg Falling Number. Using the historical NVPT data in  
48 a genome-wide association analysis, we uncovered a significant marker-trait  
49 association peak on wheat chromosome 6A spanning the *NAM-A1* gene that have been  
50 previously associated with early senescence. Together our results show the value of  
51 utilizing the data routinely collected during variety evaluation process for examining  
52 breeding progress and the genetic architecture of important traits.

53

54

55 **INTRODUCTION**

56 Over the last three years, there has been a rapid surge in the development of genomic  
57 resources for wheat (reviewed in Adamski *et al.* 2020). This includes a chromosome-  
58 scale reference assembly of the Chinese Spring cultivar (RefSeqv1) and a pan-genome  
59 resource comprised of chromosome and scaffold-level assemblies of 15 hexaploid  
60 wheat cultivars (IWGSC *et al.* 2018; Walkowiak *et al.* 2020). There is also a wide range  
61 of array-based (Axiom-35K, iSelect 90K, Axiom-660K and Axiom-820K; Wang *et al.*  
62 2014; Winfield *et al.* 2016; Allen *et al.* 2017), sequencing-based (e.g DARTSeq,  
63 RADSeq) or PCR-based (e.g KASP, TaqMan, rhAmp; Semagn *et al.* 2014; Ayalew *et al.*  
64 2019) SNP genotyping assays available to wheat researchers and breeders. There  
65 have also been efforts to re-sequence different wheat populations either through  
66 reduced-representation sequencing approach like exome-capture and sequencing (e.g  
67 He *et al.* 2019; Krasileva *et al.* 2017; Jordan *et al.* 2015) or through whole genome  
68 resequencing (e.g Cheng *et al.* 2019; Scott *et al.* 2020). This preponderance of  
69 genomics and genotypic data which are available in open-access repositories (e.g.  
70 EnsemblPlants, CerealsDB; Bolser *et al.* 2016; Howe *et al.* 2020; Wilkinson *et al.* 2020)  
71 now makes it possible to map traits at high-resolution (e.g Walkowiak *et al.* 2020),  
72 examine population diversity at whole genome levels or in breeding units (haplotypes:  
73 e.g Brinton *et al.* 2020; Scott *et al.* 2020), and implement genome-assisted breeding  
74 schemes using marker-assisted and/or genomic selection (e.g Sweeney *et al.* 2019;  
75 Rasheed and Xia 2019).

76 Despite these advances, the generation of high-quality and field-relevant phenotyping  
77 data remains a major bottleneck. Modern phenomics platforms have improved

78 phenotyping throughput and precision under controlled conditions, but these do not  
79 always capture the environmental effects experienced under real-world farming  
80 conditions (Yang *et al.* 2020). Given climate change projections of fluctuating radiation,  
81 heat and precipitation patterns in major wheat growing areas (including the UK),  
82 breeding for phenotypic stability and understanding complex gene x environment  
83 interactions is of high priority (Semenov 2009; Trnka *et al.* 2019).

84 Due to their large scale and multi-environment (years and locations) design, historical  
85 dataset from national variety performance trials (NVPT) provide sufficient dimensions, in  
86 terms of years and locations to examine phenotypic trends and study gene x  
87 environment interactions. These historical datasets are, however, incomplete by design  
88 because of, for example, changes in the number and specific set of varieties trialed and  
89 changes in the field sites used from year to year. Previous studies have analyzed NPVT  
90 data for wheat in the UK (Silvey 1981; Mackay *et al.* 2011) and similar analyses of  
91 historical data have been conducted elsewhere (e.g Crossa *et al.* 2007; Pozniak *et al.*  
92 2012).

93 In the UK, new wheat varieties undergo statutory tests before they are registered on the  
94 National List (NL). Registered varieties are subsequently introduced (or maintained on)  
95 the UK Recommended List (RL) after undergoing independent non-statutory NPVT  
96 managed by the Agriculture and Horticulture Development Board (AHDB, formerly  
97 Home-Grown Cereals Authority). The NL serves as variety registry while the RL is used  
98 as a reference by farmers for variety selection. Mackay *et al.* (2011) re-analyzed data  
99 from the UK NL and RL trials conducted between 1948 – 2007, and found significant  
100 yield improvement that was mostly attributed to plant breeding. In the present study, we

101 analyzed data from the UK RL NVPT for winter wheat between 2002 - 2017 and used  
102 this to examine temporal trends in eight yield, adaptation, and grain quality traits. We  
103 also demonstrate the usefulness of these NVPT dataset for trait mapping to uncover loci  
104 of breeding importance.

105

106

107

## MATERIALS AND METHODS

### 108 **NVPT datasets**

109 We downloaded result files for the NVPT for winter wheat in the UK from 2002 – 2010  
110 and 2012 - 2017 from the AHDB website (accessible at: [https://ahdb.org.uk/knowledge-](https://ahdb.org.uk/knowledge-library/recommended-lists-for-cereals-and-oilseeds-rl-harvest-results-archive)  
111 [library/recommended-lists-for-cereals-and-oilseeds-rl-harvest-results-archive](https://ahdb.org.uk/knowledge-library/recommended-lists-for-cereals-and-oilseeds-rl-harvest-results-archive)). We  
112 focused our study on data for eight traits including yield, adaptation and grain quality  
113 traits. Yield and height data were collected from treated and untreated trials. The treated  
114 trials included management for diseases (fungicide spray) while the untreated trials did  
115 not include disease management. Both trials were managed under standard husbandry  
116 practices including the application of plant growth regulator (PGR), herbicide, fertiliser  
117 and pest control management as recommended by AHDB. Details of the AHDB RL trial  
118 protocol is accessible at: <https://ahdb.org.uk/rlprotocols>. Before analyses, we filtered  
119 the dataset to remove observations with unknown locations or from locations where  
120 trials were abandoned. Varieties that were trialed in a single year were also omitted.  
121 The nomenclature of varieties, locations and counties were standardized in cases

122 where different designation or acronyms were used for the same variety, location or  
123 county across different years. After filtering, the distribution of the observations obtained  
124 for each of the eight target traits resemble a bell curve suggesting normal distribution  
125 (Figure S1).

## 126 **Germplasm**

127 Data for a total of 168 varieties were used in this study. These include 133 varieties  
128 whose phenotype information were obtained from the AHDB website as described  
129 above. For 139 varieties, which included additional 35 pre-2002 UK wheat varieties,  
130 genotype data from the Axiom-35K array was used as described below. The number of  
131 varieties used for each analysis in this study are detailed in Figure S2.

## 132 **Statistical Analyses**

133 We used a two-stage approach to examine the linear trend of trait from the NVPT data.  
134 First, we fitted a linear mixed model (LMM) to the NVPT data using restricted maximum  
135 likelihood (REML) estimation. The model was implemented using the lme4 package in R  
136 as:

$$137 \quad Y_{ijk} = \mu + v_i + y_j + S_{jk} + e_{ijk}$$

138  $Y_{ijk}$  is the historical performance of variety  $i$  in year  $j$  at location  $k$ .  $\mu$  is the overall mean  
139 performance of all varieties,  $v_i$  is the effect of variety  $i$ ,  $y_j$  is the effect of year  $j$  (the  
140 calendar year of the trial) and  $S_{jk}$  is the effect of location  $k$  within year  $j$ .  $e_{ijk}$  is the  
141 residual variance arising from factors not accounted for in the model including variety x  
142 year interaction. As our main interest was the performance for each variety, the variety  
143 effect was fitted as fixed factor while the year and site (nested within year) were fitted as

144 random factors. This is slightly different to the strategy used by Mackay et al. (2011),  
145 which also included calendar year as a fixed factor to account for the long year interval  
146 (1948 – 2002) examined and changes in trial management system across these years.  
147 Given the short interval examined in this study, we believe the management systems  
148 were fairly uniform across the trial year. We derived estimates for the varieties means  
149 (EVM) from the LMM. Second, we used a linear model to regress the EVM derived from  
150 the LMM above against the year the variety was first entered into the NVPT. For trait  
151 comparison between end-use groups, Analysis of Variance (ANOVA) followed by post-  
152 hoc TukeyHSD was used to evaluate and compare significant difference in EVM of  
153 varieties belonging to different end-use groups. The *lsmmeans* function implemented in the  
154 *R* *lsmmeans* package (Lenth 2016) was used to estimate and compare slopes of the  
155 linear regression between groups. For slope comparisons between the four end-use  
156 groups, the adjusted P value is presented based on Tukey’s method of comparison.

157 We used the Finlay Wilkinson regression to examine phenotype stability (Finlay and  
158 Wilkinson 1963). The original Finlay Wilkinson regression used by breeders to examine  
159 varietal adaptability is not best suited for data from incomplete trial design as the  
160 environment means used for normalizing varietal performance are biased due to  
161 incomplete replication of varieties across all environments. To circumvent this bias in  
162 our analysis, we used the Bayesian method proposed by Su et al., (2006) and  
163 implemented in the *R* package *FW* (Lian and de los Campos 2016). Only varieties that  
164 were trialed in more than three years were used for this analysis. The mean values for  
165 each variety in each year were used as input. The model was fitted with the Bayesian  
166 “gibbs” method, with 50000 iterations and 5000 burnIn rate as suggested for wheat



167 analyses in the FW package paper (Lian and de los Campos 2016). The FW  
168 coefficients are presented as  $b + 1$  which describes expected change in variety  
169 performance per unit change of the environment effect (Lian and de los Campos 2016).

## 170 **Genotyping, population structure and association analysis**

171 A subset of 139 modern varieties and historic cultivars were genotyped using the  
172 Axiom-35K array (Allen *et al.* 2017). We filtered the genotype data to include only sites  
173 with  $> 0.05$  minor allele frequencies. Marker with heterozygous calls but that were  
174 missing one of the homozygous calls (e.g markers with AA and AC but missing CC)  
175 were also removed as these are likely due to wrong genotype assignment during  
176 automated genotype cluster analysis. The markers were filtered to remove pair of loci  
177 with high linkage disequilibrium ( $R^2 > 0.75$ ). This was done to remove biases arising  
178 from high LD loci (such as from introgression from wild relatives) that can bias the  
179 contributions of such loci in population structure analysis. To assign physical positions  
180 to the Axiom markers, their sequences were used as queries in BLASTn alignments  
181 against the IWGSC RefSeqv1.0 assembly (IWGSC *et al.* 2018) as described in Brinton  
182 *et al.* (2020) and the best hits on each of the three wheat homoeologous genomes (A, B  
183 and D) were recorded. Of these, the correct homoeologous chromosome was selected  
184 using genetic mapping information from 13 populations (Gardiner *et al.* 2019) where  
185 available for each marker. Otherwise, the highest BLASTn score was used to select the  
186 homoeologous chromosome. In case of conflicting genetic mapping results for the  
187 correct chromosome between the mapping populations, the most frequent outcome was  
188 used.

189 Population structure analysis was done using discriminant analysis of principal  
190 component (DAPC) as implemented in the Adegnet *R* package (Jombart and Ahmed  
191 2011). For this, the number of population cluster ( $k$ ) was determined by kmeans  
192 clustering using a range of  $k$ . The  $k$  with the minimum Bayesian Information Criterion  
193 was selected as the optimum  $k$ . To increase the accuracy of grouping, 50 iterations of  
194 the kmeans clustering algorithm was run and the population group to which a variety  
195 was most frequently assigned was selected. Also, the cross-validation function  
196 (xvalDapc) was used to select the optimum number of principal components to use for  
197 DAPC.

198 GWASpoly – a *R* package for association analysis in polyploid crop, was used for  
199 GWAS (Rosyara *et al.* 2016). We used a K+Q mixed model where K represents the  
200 kinship matrix describing the relatedness between the varieties and Q represents the  
201 population grouping derived from the DAPC analysis. A Bonferroni threshold with  
202 adjusted  $P$  value below 0.05 was used to select markers with significant association  
203 with the trait of interest.

#### 204 **Data Availability**

205 The original data files for the trials described in this study can be downloaded from the  
206 AHDB website at: [https://ahdb.org.uk/knowledge-library/recommended-lists-for-cereals-](https://ahdb.org.uk/knowledge-library/recommended-lists-for-cereals-and-oilseeds-ri-harvest-results-archive)  
207 [and-oilseeds-ri-harvest-results-archive](https://ahdb.org.uk/knowledge-library/recommended-lists-for-cereals-and-oilseeds-ri-harvest-results-archive). As data for different traits are combined in these  
208 original files, we re-organized the files to separate the data for each trait into separate  
209 files. The re-organized files are available at Zenodo:  
210 <https://doi.org/10.5281/zenodo.4761528>. The QC-filtered trial data used for subsequent

211 analyses are presented in Table S1. Table S2 contains the end-use group information  
212 and linear-mixed-model-derived EVM for the varieties trialed. Table S3 contains the FW  
213 coefficients for each variety used in the FW regression analysis. The filtered Axiom-35K  
214 genotyping data and their genome distribution are presented in Table S4 and Table S5,  
215 respectively. Table S6 contains the population group information for each variety  
216 genotyped.

217

218

219

## RESULTS

220 **Estimates from multi-environment trial capture expected relationship between**  
221 **traits**

222 We analyzed the historical data set of the UK RL NVPT from 2002 to 2017. We focused  
223 our analyses on six traits of agronomic and economic importance: yield, plant height,  
224 days to ripening, Hagberg Falling Number (HFN), grain protein content and specific  
225 weight. For yield and plant height, we analyzed data coming from (fungicide) treated  
226 and untreated trials. This results in a final dataset for eight traits. After quality controls  
227 (described in Materials and Methods), we retained 52,152 observations for these eight  
228 traits from 133 winter wheat varieties (Table S1). These 133 varieties were phenotyped  
229 in at least two years across a combined 162 locations, with a subset of 95 locations  
230 being used for evaluations in two or more years. Table 1 details the number of varieties

231 phenotyped for each trait and the number of locations and year-location combinations  
232 used. The trial locations were spread across 43 counties and unitary authorities in  
233 England, Wales, Scotland, and Northern Ireland as shown in Figure 1.

234 Using a linear mixed model that accounted for variation arising from the different years  
235 and trial locations, we derived estimates for variety mean (hereafter referred to as EVM)  
236 for each variety for each trait (Table S2). Correlation analysis using the EVM captured  
237 expected patterns of relationship between the measured traits (Figure 2). We observed  
238 significant positive correlations between treated and untreated trials for height and yield,  
239 although the correlation between treated/untreated trials for height was much stronger  
240 than for yield. HFN and grain protein content were positively correlated to each other,  
241 but negatively correlated to treated yield, treated plant height and days to ripening.

242

### 243 **Examining Trait Trends**

244 We next examined the temporal pattern across the 15 years of trials to highlight linear  
245 trends in traits due to breeding progress. For this, we regressed the EVM for each  
246 variety on its year of first entry to the NVPT which is directly related to its year of  
247 release. This regression likely captures temporal pattern of breeding progress as  
248 successive releases of varieties are expected to outperform previous releases in one or  
249 more traits. We observed linear increase for yield between 2002 - 2017 in both the  
250 treated and untreated trials (Figure 3A - B). The rate of yield increase in the untreated  
251 trial was significantly higher than in the treated trials (rate difference = 0.093  
252 tonnes/ha/year,  $P < 0.0001$ ). Conversely, grain protein content and HFN showed small

253 but significantly decrease over time ( $P < 0.001$  and  $0.03$ , respectively; Figure 3C - D).

254 We also observed a significant delay in days to ripening over the same period ( $P =$   
255  $0.004$ , Figure 3E). Changes in plant height (treated and untreated) and specific weight  
256 were not significant ( $P = 0.31 - 0.51$ , Figure 3F - H) suggesting stable trends.

257 UK wheat varieties are classified into four main end-use groups as described by the UK  
258 Flour Millers ([www.ukflourmillers.org](http://www.ukflourmillers.org)). These include the UK Flour Group 1 – 4,  
259 hereafter referred to as UFG1-4. The UFG1 and UFG2 varieties have superior grain  
260 quality (grain protein content and HFN) and are used for breadmaking. UFG3 varieties  
261 are often used for biscuits and cakes, whereas UFG4 varieties usually have high yield  
262 potential but inferior grain quality and are mainly used for animal feed. As yield and  
263 protein content are important measures for these end-use classifications, we examined  
264 how the temporal trends observed for these traits varied for the different end-use  
265 groups. Expectedly, UFG4 varieties showed higher yield while the bread making  
266 varieties (UFG1-2) show higher grain protein content (Figure 4A - B). All end-use  
267 groups showed a significant increasing yield trend across time and the rates of increase  
268 were not significantly different between the end-use groups ( $P = 0.263 - 0.885$ ; Figure  
269 4C). UFG2 and UFG4 varieties showed a significant and comparable decline in grain  
270 protein content over time (Figure 4D) while changes in protein content of UFG1 and  
271 UFG3 varieties were non-significant (Figure 4D).

272

273 **Yield, protein content, specific weight, but not HFN, are stable in UK**

274 **environments**

275 Using a modified Finlay Wilkinson (FW) regression (Lian and de los Campos 2016) for  
276 measuring genotype x environment interaction, we examined the stability of yield and  
277 end-use quality traits across the trial years (Figure 5, Table S3). Only 95 varieties that  
278 were trialed in three or more years were included in this analysis. FW regression  
279 measures the stability of variety performance across different environments by  
280 regressing individual variety trait means on the environmental effect (Finlay and  
281 Wilkinson 1963). FW regression coefficient close to 1 suggests average varietal stability  
282 in which variety performance is consistent with environment effect i.e. variety performs  
283 poorly in bad environments and well in good environments. Larger values suggest  
284 below average stability i.e. higher environmental sensitivity.

285 Yield was stable across years in most UK wheat varieties (regression coefficients close  
286 to 1, Figure 5A). Similarly, most of the varieties examined showed high stability in  
287 protein content and specific weight, with bread-making varieties stably producing grains  
288 with above median protein and specific weights (Figure 5B). HFN, on the other hand,  
289 showed varying FW coefficients ranging from -0.28 (KWS Barrel) to 6.03 (Hyperion).  
290 More than 83% of the 95 UK wheat varieties examined have FW coefficient > 2 for HFN  
291 suggesting below-average stability. Figure 5B shows the HFN performance of three  
292 varieties with different FW coefficients: KWS\_Barrel, Hyperion, and Napier with (FW  
293 coefficient of 1.02). Napier consistently showed low HFN values in all the years it was  
294 trialed. On the other hand, Hyperion with the highest FW co-efficient, showed extreme  
295 HFN phenotypes - very low HFN value in Low-HFN years and very high HFN value in

296 high-HFN years suggesting high environmental sensitivity. KWS\_Barrel's HFN  
297 performance was fairly constant irrespective of the environments it was trialed.

298

299

300

### 301 **Post-2002 UK wheat varieties belong into four distinct population groups**

302 Using the Axiom35k SNP array (Allen *et al.* 2017) we genotyped 139 varieties including  
303 a subset of those trialed between 2002 - 2017 (104) and additional historic UK wheat  
304 cultivars. After quality filtering (described in Materials and Methods), we selected 4298  
305 high quality markers dataset (Table S4) including 1715, 1781 and 778 markers on the  
306 A, B and D sub-genomes, respectively (Table S5). Using these genotypic data, we  
307 examined the population structure within the UK wheat collection. DAPC analysis  
308 revealed four distinct population groups (Pop1-4; Figure 6A, Table S6). Using Helium  
309 for pedigree visualization (Shaw *et al.* 2014), we could trace the modern founder  
310 parents for three (Pop1, 2 and 4) of the four population groups. Pop1 contains 19  
311 varieties, of which 15 (79%) have Cadenza in their pedigree, consistent with Cadenza  
312 being an important parent for Pop1. Pop2 comprises 27 varieties, 20 (74%) of which  
313 contain Claire in their pedigree. Pop4 includes 30 varieties, 28 (93%) of which trace  
314 their pedigree to Robigus suggesting Robigus as an important parent for this group  
315 (Figure 6B). Pop3 is the largest group with 63 varieties with a more diverse pedigree  
316 structure. Using a subset of 111 varieties with both genotype and end-use group  
317 information (Figure S2), we examined the association between the population groups

318 and end-use groups (Figure S3). The “Claire” (Pop2) and “Robigus” (Pop4) population  
319 groups only contain UFG3 and UFG4 varieties used for biscuit/cakes and feeds,  
320 respectively. While the “Cadenza” (Pop1) population group mostly (71%) contain UFG1  
321 and UFG2 varieties used for breadmaking.

322

### 323 **Using NVPT Data for Trait Mapping**

324 We next examined the suitability of using the EVM obtained from the NVPT for trait  
325 mapping through a genome-wide association study (GWAS). To ascertain that our  
326 genotypic data and population composition are suitable for GWAS, we included data for  
327 the presence/absence of *Sm1* - a major locus known to underlie resistance to Orange  
328 wheat blossom midge (OWBM) in UK wheat varieties. As expected, we identified a  
329 major peak associated with OWBM resistance on wheat chromosome 2B (Figure S4A  
330 and B). This peak co-localizes with the physical position for *Sm1* (Walkowiak *et al.*  
331 2020), supporting our *Sm1* marker information. Importantly, our GWAS analysis  
332 identified a region on the short arm of chromosome 6A with significant marker trait  
333 association (MTA) for days to ripening (Figure 7A - B). The days to ripening MTA region  
334 contain two markers, AX-94549511 and AX-94710688, located in an interval (73.5 –  
335 86.5 Mbp) containing the *NAM-A1* gene (TraesCS6A02G108300; 77.1 Mbp) that is  
336 associated with variation in senescence in European wheat cultivars (Cormier *et al.*  
337 2015). Days to ripening was significantly different between the allele groups of marker  
338 AX-94710688 which has the highest significance score (Figure 7C).

339



340

341

## DISCUSSIONS

### 342 **Yield is an important driver of linear trends**

343 Using historical data from UK NVPT we examined phenotypic trends in winter wheat  
344 varieties trialed between 2002 – 2017. Our analysis highlights a linear increase for yield  
345 (treated and untreated) and days to ripening, and a linear decrease in protein content  
346 and HFN. Given that the model used to analyze this data adjusted for variation arising  
347 from locations across years, and that agronomic practices are largely consistent in the  
348 NVPT, this linear trend can be attributed mostly to genetic improvement of varieties over  
349 time. Mackay *et al.* (2011) similarly attributed 88% of yield increase in cereals crops in  
350 the UK from 1982 – 2007 to genetic improvement. Yield is the most important  
351 determinant of grain market value; as such the linear increase in yield is consistent with  
352 concerted breeding efforts to improve yield under UK wheat growing conditions. In  
353 addition to the overall yield trend, we also observed consistent and similar linear  
354 increases in yield in all the four UK Flour Groups (UFG1 – 4). This further highlight yield  
355 as the main breeding target for varietal development (and adoption into the RL)  
356 irrespective of their target end-use groups.

357 We observed that the rate of yield increase in untreated trials (152 kg/ha/year) is  
358 significantly ( $p < 0.0001$ ) higher than in treated trials (60 kg/ha/year) across the 15-year  
359 period. Mackay *et al.* (2011) similarly observed the same pattern between 1982 – 2007  
360 and argued that this pattern is due to loss of disease resistance by some varieties  
361 during the trial period examined. Varieties progressively lose resistance over time

362 (Meikle and Scarisbrick 1994) and consequently variety performance declines with time.  
363 This mean that under untreated trial conditions, newly introduced varieties with ‘intact’  
364 disease resistance will outperform a portion of previously released varieties whose  
365 disease resistance have ‘broken down’. This differential loss of disease resistance will  
366 further increase the variation in variety yield performance in untreated trials in addition  
367 to the variation arising from non-disease related genetic factors observed in treated  
368 trials. In other words, there is an “upward bias” in variety effects for the yield observed in  
369 untreated trials as described by Mackay *et al.* (2011).

370 Based on the rationale described above, it would be expected that a sudden loss of  
371 resistance in a large proportion of varieties due to the emergence of a more virulent  
372 pathogen race would result in a marked upward bias in variety effect estimates. This is  
373 what we observed when we compared yield trends before and after the emergence of  
374 the yellow rust (*Puccinia striiformis*) “Warrior” race in 2011 (Hubbard *et al.* 2015). The  
375 rate of yield increase in untreated trials significantly ( $P < 0.001$ ) increased three-fold  
376 from 123 kg/ha/year before the emergence of the “Warrior” race to 372 kg/ha/year after  
377 the emergence of the “Warrior” race (Figure 8). During the same time, the rate of yield  
378 increase was significantly ( $P = 0.2697$ ) comparable in the treated trial before and after  
379 the emergence of the “Warrior” race (Figure 8). The use of historical data in this study  
380 allowed us to identify this trend and thus highlight the importance of such datasets for  
381 dissecting the effect of important events in a national cropping history such as change in  
382 disease epidemics.

383 It is also interesting to speculate that the higher rate of yield increase observed in the  
384 untreated trials indirectly suggests that newer varieties contain new sources of genetic

385 resistance that improve their performance over older varieties at a rate greater than  
386 observed in the treated trials. This is likely not accidental, but points to concerted efforts  
387 by breeders to introduce more effective source of genetic resistance into UK wheat. The  
388 improved genetic resistance profile of newer varieties narrows the yield gap observed  
389 between the treated and untreated trials. We cannot, however, rule out the fact that this  
390 narrower yield gap might be due to less disease pressure in recent years. A more  
391 detailed genetic characterization will be needed to accurately describe the genetic  
392 resistance profile of UK wheat varieties.

393 Concomitant with the yield increase, there has been a decrease in grain protein content  
394 from 2002 - 2017 which reflects the well-established antagonistic relationship between  
395 yield and protein content (Figure S5; Simmonds 1995). Unlike for yield, linear trends  
396 were not consistent across the four end-use groups. While we identified an overall  
397 significant decrease in grain protein content over time, this was not observed in the  
398 UFG1 varieties that are used for breadmaking (Figure 4). UFG2 varieties which also  
399 have breadmaking potential, however, showed significant decrease over time just like  
400 the UFG4 varieties used for animal feed. The decline in UFG2 varieties grain protein  
401 content may be due to the fact that this group comprise varieties that did not  
402 consistently meet the higher grain quality (in particular protein content) requirement for  
403 UFG1 and were downgraded to UFG2 . The fact that our analysis captures expected  
404 trait (yield, protein content and HFN) differences in end-use groups (Figure 4A - B,  
405 Figure S6A - B) suggests that the linear mixed effect model adopted is appropriate to  
406 handle the incomplete design of the NVPT and to examine phenotype trends within  
407 each end-use group.

408

409 The multidimensional (year and location) nature of the NVPT also allows for examining

410 varietal adaptability across multiple environments. We observed year-to-year stability in

411 yield and protein content in most of the varieties irrespective of their end-use group.

412 This is likely attributable to the fact that we mainly examined data from RL trials that are

413 comprised of varieties which had been previously screened for distinctness, uniformity,

414 and stability during National Listing trials. Despite this 'pre-screening', almost all the

415 varieties show high environmental sensitivity for HFN (FW coefficient: -0.28 to 6.03).

416 Sjoberg et al (2020) similarly obtained a wide range of FW coefficient for HFN in 133

417 varieties trialed across three years in the Pacific Northwest of the US.

418 HFN is inversely related to  $\alpha$ -amylase activity within the grain. High  $\alpha$ -amylase activity

419 caused by incidences of pre-harvest sprouting (PHS) and/or pre-maturity amylase

420 (PMA) reduce the bread-making potential of wheat grains. Both PHS and PMA are

421 known to be highly environmental dependent: PHS is induced by wet raining conditions

422 during harvest maturity while PMA is mostly caused by low or high temperature shock

423 around grain physiological maturity (Joe *et al.* 2005; Mares and Mrva 2014). The

424 environmental conditions required to induce PHS and PMA occur infrequently from year

425 to year making it difficult for breeders to screen for these traits under field conditions. In

426 addition, both traits are controlled by many genes most of which have small effects

427 making marker assisted selection (MAS) for HFN stability difficult. Within the last

428 decade, progress has been made in identifying genes with major effects on PHS

429 including *TaMFT* and *TaMKK3-A* (Nakamura *et al.* 2011; Torada *et al.* 2016). We also

430 previously showed the effect of *TaMMK3-A* in reducing PHS in UK germplasm

431 (Shorinola *et al.* 2016) and developed markers to facilitates its use in breeding  
432 (Shorinola *et al.* 2017). The availability of markers for major genes controlling PHS now  
433 makes it possible to apply MAS for improving HFN. However, selection for PMA  
434 resistance remains a major challenge because the conditions that induces PMA varies  
435 between varieties (Liu *et al.* 2021)

436

### 437 **Population structure within UK winter wheat germplasm**

438 Our analysis reveals that three modern wheat varieties largely contribute to the  
439 development of winter wheat varieties released in the UK between 2002 - 2017. These  
440 include Cadenza (Pop1), Claire (Pop2) and Robigus (Pop4), which were themselves  
441 released in 1992, 1999, 2005, respectively. Together, 51% of the 114 varieties that  
442 were first trialed between 2002 – 2017 were derived from either Cadenza, Claire, and/or  
443 Robigus. Based on pedigree visualization, Robigus (and Pop4 varieties) appears to be  
444 a more recent introduction to the UK (Figure S7) suggesting that new gene pools are  
445 being introduced into the UK wheat breeding landscape. Since its introduction Robigus  
446 has made significant contribution to UK wheat pedigree. Fradgley et al (2019) identified  
447 Robigus as the second most used parents in UK breeding, next to Capelle Desprez. We  
448 also observed a clear association between the population groups and end use groups.  
449 Pop2 and Pop4 varieties, mostly derived from Claire and Robigus which are themselves  
450 UFG3 varieties, both contain only UFG3 (biscuit) and UFG4 (feed) varieties. Pop1  
451 varieties, which are mostly derived from Cadenza - a UFG2 variety, mostly contain  
452 UFG1 and UFG2 (breadmaking) varieties. One probable explanation for this association  
453 is that breeders tend to make crosses with varieties from the same end-use groups to

454 ensure that the gene combinations underlying the traits in the target end-use groups are  
455 preserved in their progenies (Simon Berry 2021, personal communication). This  
456 suggests that the choice of parents is an important determinant of the end-use class of  
457 varieties.

458 Due to the type (gene-based SNP) and limited number of markers used, we  
459 acknowledge the limitation of this study to more precisely define the population groups  
460 represented in UK winter bread wheat collection to a high resolution. Brinton et al.  
461 (2020) demonstrated the inadequacy of array-based genotyping chips to precisely  
462 define haplotype groups due to their gene-centric design. Scaffold-level assemblies are  
463 now available for important UK wheat varieties including representatives of Pop1, Pop3  
464 and Pop4 (Cadenza, Claire and Robigus; Walkowiak *et al.* 2020). These genome  
465 assemblies can be combined with high-density genotyping or re-sequencing data to  
466 more precisely define the populations groups of wheat varieties grown in the UK.

467

#### 468 **Historical data could be valuable for trait mapping**

469 We identified significant marker-trait association (MTA) peaks spanning a gene (*NAM-*  
470 *A1*) that have been previously associated with natural variation in a trait of agronomic  
471 interest.. Cormier et al. (2015) identified a C/T missense SNP in the NAC domain and  
472 A/- frame-shift deletion in *NAM-A1* leading to a truncated protein from a worldwide  
473 wheat collection and suggested functional roles for these polymorphisms. Harrington et  
474 al., (2019) showed that missense mutations in the NAC domain of *NAM-A1* result in  
475 delayed peduncle and flag leaf senescence. Similarly, Avni et al (2014) showed that  
476 loss of function *NAM-A1* mutants showed significant delay in senescence. Given the

477 large interval covered by the MTA peaks for days to ripening on chromosome 6A (73.4  
478 Mbp – 86.5 Mbp, ~140 genes) we cannot rule out the possibility that other gene(s)  
479 underly this days to ripening effect. Nonetheless, the co-localization of our GWAS peak  
480 with a known locus for the target trait highlights the usefulness of this historical dataset  
481 for quantitative trait mapping.

482 Beside the MTA for days to ripening, we did not identify strong MTA for the other traits.  
483 This might be due to the fact that many of the major genes controlling these traits have  
484 been mostly fixed in the UK wheat population examined, and that the population size  
485 used in our study is not large enough to pick up minor effect and/or minor allele  
486 frequency gene(s). Also, while the phenotyping conditions used in the NPVT might be  
487 representative of UK farming conditions, they might not always be best suited for trait  
488 mapping. An example is the application of plant growth regulators in the trials to prevent  
489 lodging (by reducing plant height) but this might mask the effect of height genes.  
490 Despite these limitations, our work demonstrates that national trials data can be  
491 valuable for examining trait trends, stability, and genetic architecture.

492

### 493 **Acknowledgments**

494 We thank the Agriculture and Horticulture Development Board (AHDB) for making the  
495 trial data publicly available. We also thank Dr Chinyere Ekine for useful discussion on  
496 statistical analyses and Dr Simon Berry for suggestions to the manuscript.

497

498 **Funding information**

499 This research is supported by the UK Biotechnology and Biological Sciences Research  
500 Council (BBSRC) Designing Future Wheat program (BB/P016855/1) and a Royal  
501 Society FLAIR award (FLR\R1\1918500) to OS.

502

503

504 **Conflicts of Interest**

505 The authors declare no conflict of interest.

506

507

508

**REFERENCES**

509 Adamski, N. M., P. Borrill, J. Brinton, S. A. Harrington, C. Marchal *et al.*, 2020 A  
510 roadmap for gene functional characterisation in crops with large genomes: Lessons  
511 from polyploid wheat (C. S. Hardtke, Ed.). *eLife* 9: e55646.

512 Allen, A. M., M. O. Winfield, A. J. Burridge, R. C. Downie, H. R. Benbow *et al.*, 2017  
513 Characterization of a Wheat Breeders' Array suitable for high-throughput SNP  
514 genotyping of global accessions of hexaploid bread wheat (*Triticum aestivum*). *Plant*  
515 *Biotechnology Journal* 15: 390–401.

516 Avni, R., R. Zhao, S. Pearce, Y. Jun, C. Uauy *et al.*, 2014 Functional characterization of  
517 GPC-1 genes in hexaploid wheat. *Planta* 239: 313–324.



- 518 Ayalew, H., P. W. Tsang, C. Chu, J. Wang, S. Liu *et al.*, 2019 Comparison of TaqMan,  
519 KASP and rhAmp SNP genotyping platforms in hexaploid wheat. PLOS ONE 14:  
520 e0217222.
- 521 Bolser, D., D. M. Staines, E. Pritchard, and P. Kersey, 2016 Ensembl Plants: Integrating  
522 Tools for Visualizing, Mining, and Analyzing Plant Genomics Data, pp. 115–140 in *Plant*  
523 *Bioinformatics: Methods and Protocols*, edited by D. Edwards. Methods in Molecular  
524 Biology, Springer, New York, NY.
- 525 Brinton, J., R. H. Ramirez-Gonzalez, J. Simmonds, L. Wingen, S. Orford *et al.*, 2020 A  
526 haplotype-led approach to increase the precision of wheat breeding. Communications  
527 Biology 3: 712.
- 528 Cheng, H., J. Liu, J. Wen, X. Nie, L. Xu *et al.*, 2019 Frequent intra- and inter-species  
529 introgression shapes the landscape of genetic variation in bread wheat. Genome  
530 Biology 20: 136.
- 531 Cormier, F., M. Throude, C. Ravel, J. L. Gouis, M. Leveugle *et al.*, 2015 Detection of  
532 NAM-A1 Natural Variants in Bread Wheat Reveals Differences in Haplotype Distribution  
533 between a Worldwide Core Collection and European Elite Germplasm. Agronomy 5:  
534 143–151.
- 535 Crossa, J., J. Burgueño, S. Dreisigacker, M. Vargas, S. A. Herrera-Foessel *et al.*, 2007  
536 Association Analysis of Historical Bread Wheat Germplasm Using Additive Genetic  
537 Covariance of Relatives and Population Structure. Genetics 177: 1889–1913.
- 538 Finlay, K., and G. Wilkinson, 1963 The analysis of adaptation in a plant-breeding  
539 programme. Aust. J. Agric. Res. 14: 742–754.

540 Fradgley, N., K. A. Gardner, J. Cockram, J. Elderfield, J. M. Hickey *et al.*, 2019 A large-  
541 scale pedigree resource of wheat reveals evidence for adaptation and selection by  
542 breeders. *PLOS Biology* 17: e3000071.

543 Gardiner, L.-J., L. U. Wingen, P. Bailey, R. Joynson, T. Brabbs *et al.*, 2019 Analysis of  
544 the recombination landscape of hexaploid bread wheat reveals genes controlling  
545 recombination and gene conversion frequency. *Genome Biology* 20: 69.

546 Harrington, S. A., L. E. Overend, N. Cobo, P. Borrill, and C. Uauy, 2019 Conserved  
547 residues in the wheat (*Triticum aestivum*) NAM-A1 NAC domain are required for  
548 protein binding and when mutated lead to delayed peduncle and flag leaf senescence.  
549 *BMC Plant Biology* 19: 407.

550 He, F., R. Pasam, F. Shi, S. Kant, G. Keeble-Gagnere *et al.*, 2019 Exome sequencing  
551 highlights the role of wild-relative introgression in shaping the adaptive landscape of the  
552 wheat genome. *Nature Genetics* 51: 896–904.

553 Howe, K. L., B. Contreras-Moreira, N. De Silva, G. Maslen, W. Akanni *et al.*, 2020  
554 Ensembl Genomes 2020—enabling non-vertebrate genomic research. *Nucleic Acids*  
555 *Research* 48: D689–D695.

556 Hubbard, A., C. M. Lewis, K. Yoshida, R. H. Ramirez-Gonzalez, C. de Vallavieille-Pope  
557 *et al.*, 2015 Field pathogenomics reveals the emergence of a diverse wheat yellow rust  
558 population. *Genome Biology* 16: 23.

559 IWGSC, R. Appels, K. Eversole, N. Stein, C. Feuillet *et al.*, 2018 Shifting the limits in  
560 wheat research and breeding using a fully annotated reference genome. *Science* 361:  
561 eaar7191.

562 Joe, A. F. T. W., R. W. Summers, G. D. Lunn, M. D. Atkinson, and P. S. Kettlewell,  
563 2005 Pre-maturity  $\alpha$ -amylase and incipient sprouting in UK winter wheat, with special  
564 reference to the variety Rialto. *Euphytica* 143: 265–269.

565 Jombart, T., and I. Ahmed, 2011 adegenet 1.3-1: new tools for the analysis of genome-  
566 wide SNP data. *Bioinformatics* 27: 3070–3071.

567 Jordan, K. W., S. Wang, Y. Lun, L.-J. Gardiner, R. MacLachlan *et al.*, 2015 A haplotype  
568 map of allohexaploid wheat reveals distinct patterns of selection on homoeologous  
569 genomes. *Genome Biology* 16: 48.

570 Krasileva, K. V., H. A. Vasquez-Gross, T. Howell, P. Bailey, F. Paraiso *et al.*, 2017  
571 Uncovering hidden variation in polyploid wheat. *Proc Natl Acad Sci USA* 114: E913.

572 Lenth, R. V., 2016 Least-Squares Means: The R Package lsmeans. *Journal of*  
573 *Statistical Software* 69: 33.

574 Lian, L., and G. de los Campos, 2016 FW: An R Package for Finlay–Wilkinson  
575 Regression that Incorporates Genomic/Pedigree Information and Covariance Structures  
576 Between Environments. *G3: Genes|Genomes|Genetics* 6: 589.

577 Liu, C., K. M. Tuttle, K. A. Garland Campbell, M. O. Pumphrey, and C. M. Steber, 2021  
578 Investigating conditions that induce late maturity alpha-amylase (LMA) using  
579 Northwestern US spring wheat (*Triticum aestivum* L.). *Seed Science Research* 1–9.

580 Mackay, I., A. Horwell, J. Garner, J. White, J. McKee *et al.*, 2011 Reanalyses of the  
581 historical series of UK variety trials to quantify the contributions of genetic and  
582 environmental factors to trends and variability in yield over time. *Theor Appl Genet* 122:  
583 225–238.

- 584 Mares, D. J., and K. Mrva, 2014 Wheat grain preharvest sprouting and late maturity  
585 alpha-amylase. *Planta* 240: 1167–1178.
- 586 Meikle, S. M., and D. H. Scarisbrick, 1994 Cereal Breeding and Varietal Testing. *British*  
587 *Food Journal* 96: 11–16.
- 588 Nakamura, S., F. Abe, H. Kawahigashi, K. Nakazono, A. Tagiri *et al.*, 2011 A Wheat  
589 Homolog of MOTHER OF FT AND TFL1 Acts in the Regulation of Germination. *Plant*  
590 *Cell* 23: 3215–3229.
- 591 Pozniak, C. J., J. M. Clarke, and F. R. Clarke, 2012 Potential for detection of marker–  
592 trait associations in durum wheat using unbalanced, historical phenotypic datasets. *Mol*  
593 *Breeding* 30: 1537–1550.
- 594 Rasheed, A., and X. Xia, 2019 From markers to genome-based breeding in wheat.  
595 *Theoretical and Applied Genetics* 132: 767–784.
- 596 Rosyara, U. R., W. S. De Jong, D. S. Douches, and J. B. Endelman, 2016 Software for  
597 Genome-Wide Association Studies in Autopolyploids and Its Application to Potato. *Plant*  
598 *Genome* 9:.
- 599 Scott, M. F., N. Fradgley, A. R. Bentley, T. Brabbs, F. Corke *et al.*, 2020 Limited  
600 haplotype diversity underlies polygenic trait architecture across 70 years of wheat  
601 breeding. *bioRxiv* 2020.09.15.296533.
- 602 Semagn, K., R. Babu, S. Hearne, and M. Olsen, 2014 Single nucleotide polymorphism  
603 genotyping using Kompetitive Allele Specific PCR (KASP): overview of the technology  
604 and its application in crop improvement. *Molecular Breeding* 33: 1–14.
- 605 Semenov, M. A., 2009 Impacts of climate change on wheat in England and Wales.  
606 *Journal of The Royal Society Interface* 6: 343–350.

607 Shaw, P. D., M. Graham, J. Kennedy, I. Milne, and D. F. Marshall, 2014 Helium:  
608 visualization of large scale plant pedigrees. *BMC Bioinformatics* 15: 259.

609 Shorinola, O., B. Balcárková, J. Hyles, J. F. G. Tibbits, M. J. Hayden *et al.*, 2017  
610 Haplotype Analysis of the Pre-harvest Sprouting Resistance Locus Phs-A1 Reveals a  
611 Causal Role of TaMKK3-A in Global Germplasm. *Front Plant Sci* 8: 1555–1555.

612 Shorinola, O., N. Bird, J. Simmonds, S. Berry, T. Henriksson *et al.*, 2016 The wheat  
613 Phs-A1 pre-harvest sprouting resistance locus delays the rate of seed dormancy loss  
614 and maps 0.3 cM distal to the PM19 genes in UK germplasm. *Journal of Experimental*  
615 *Botany* 67: 4169–4178.

616 Silvey, V., 1981 The contribution of new wheat, barley and oat varieties to increasing  
617 yield in England and Wales 1947-78.

618 Simmonds, N. W., 1995 The relation between yield and protein in cereal grain. *Journal*  
619 *of the Science of Food and Agriculture* 67: 309–315.

620 Sjoberg, S. M., A. H. Carter, C. M. Steber, and K. A. Garland-Campbell, 2020  
621 Unraveling complex traits in wheat: Approaches for analyzing genotype × environment  
622 interactions in a multienvironment study of falling numbers. *Crop Science* 60: 3013–  
623 3026.

624 Su, G., P. Madsen, M. S. Lund, D. Sorensen, I. R. Korsgaard *et al.*, 2006 Bayesian  
625 analysis of the linear reaction norm model with unknown covariates. *J Anim Sci* 84:  
626 1651–1657.

627 Sweeney, D. W., J. Sun, E. Taagen, and M. E. Sorrells, 2019 Genomic Selection in  
628 Wheat, pp. 273–302 in *Applications of Genetic and Genomic Research in Cereals*,  
629 edited by T. Miedaner and V. Korzun. Woodhead Publishing.

630 Torada, A., M. Koike, T. Ogawa, Y. Takenouchi, K. Tadamura *et al.*, 2016 A Causal  
631 Gene for Seed Dormancy on Wheat Chromosome 4A Encodes a MAP Kinase Kinase.  
632 *Curr Biol* 26: 782–787.

633 Trnka, M., S. Feng, M. A. Semenov, J. E. Olesen, K. C. Kersebaum *et al.*, 2019  
634 Mitigation efforts will not fully alleviate the increase in water scarcity occurrence  
635 probability in wheat-producing areas. *Sci Adv* 5: eaau2406.

636 Walkowiak, S., L. Gao, C. Monat, G. Haberer, M. T. Kassa *et al.*, 2020 Multiple wheat  
637 genomes reveal global variation in modern breeding. *Nature* 588: 277–283.

638 Wang, S., D. Wong, K. Forrest, A. Allen, S. Chao *et al.*, 2014 Characterization of  
639 polyploid wheat genomic diversity using a high-density 90 000 single nucleotide  
640 polymorphism array. *Plant Biotechnology Journal* 12: 787–796.

641 Wilkinson, P. A., A. M. Allen, S. Tyrrell, L. U. Wingen, X. Bian *et al.*, 2020 CerealsDB—  
642 new tools for the analysis of the wheat genome: update 2020. *Database* 2020:.

643 Winfield, M. O., A. M. Allen, A. J. BurrIDGE, G. L. A. Barker, H. R. Benbow *et al.*, 2016  
644 High-density SNP genotyping array for hexaploid wheat and its secondary and tertiary  
645 gene pool. *Plant Biotechnology Journal* 14: 1195–1206.

646 Yang, W., H. Feng, X. Zhang, J. Zhang, J. H. Doonan *et al.*, 2020 Crop Phenomics and  
647 High-Throughput Phenotyping: Past Decades, Current Challenges, and Future  
648 Perspectives. *Molecular Plant* 13: 187–214.

649  
650  
651  
652

653

## FIGURE LEGEND

654 **Figure 1:** Distribution of 162 NVPT locations used in this study (2002 and 2017). The  
655 number of field sites within each county and unitary authority are indicated in colour.

656 **Figure 2:** Phenotype correlation between yield, adaptation and grain quality traits. EVM  
657 were derived for each variety from the NVPT conducted between 2002 and 2017. Only  
658 significant correlations ( $P < 0.05$ ) are indicated. Positive and negative correlations are  
659 indicated with the blue and red circles, respectively, with the size and colour intensity of  
660 the circles representing the magnitude of the correlation.

661 **Figure 3:** Temporal Trait Trend in UK Winter Wheat. Scatter plot showing changes in  
662 yield in the treated (A) and untreated trial (B), protein content (C), HFN (D), days to  
663 ripening (E), specific weight (F), plant height in treated (G) and untreated (H) trials. Blue  
664 dots represent individual varieties. For each trait, the EVM for each variety is regressed  
665 against the first year of entry in the 2002 -2017 trials. The solid line shows the  
666 regression line of the linear model and is coloured red if significant ( $P < 0.05$ ). The  
667 shaded region defines the confidence interval. The regression equation is shown within  
668 each plot. The EVM data used for these plots are in Table S2.

669 **Figure 4:** Temporal Trait Trend by End-use Groups. (A-B) Violin plots showing  
670 distribution for yield (A) and protein content (B) for the different end-use groups. The  
671 solid lines represent the mean of the distribution and the black letters show Tukey  
672 statistical comparison between the groups. Groups that are statistically similar share the  
673 same letter. (C-D) Scatter plot showing changes in yield (C) and protein content (D) for  
674 each end-use group of UK winter wheat. Each dot represents a variety while the colors

675 of the dots represent the end use groups (UK Flour Group 1-4). For each trait, the EVM  
676 for each variety is regressed against the first year of entry in the 2002 -2017 trials. The  
677 solid lines are the regression line of the linear model. The regression line equation for  
678 each group is shown. UFG1, UFG2, UFG3 and UFG4 are represented by the red,  
679 green, gray and peach dots, lines and text, respectively.

680 **Figure 5:** Phenotype Stability by End-use Group. Scatter plot showing stability for  
681 treated yield, protein content, specific weight and HFN for UK winter wheat varieties  
682 across the 15 years of trials (2002 – 2017). The y-axis represents the Finlay Wilkinson  
683 (FW) coefficient which specifies expected change in performance per unit change in  
684 environment (year) effect. Varieties with above median performance are in the shaded  
685 region. The solid line indicates stable performance in all environments i.e.  $b + 1 = 1$   
686 (Lian and De los Campos, 2016). Datapoints for three varieties whose HFN  
687 performance are further illustrated in Figure 5B are labeled. (B) Plot of HFN  
688 performance of varieties with lowest, highest and stable (~1) FW coefficient against the  
689 estimated environment year effect. The dashed lines present a constant slope of 1.

690 **Figure 6:** Population structure of UK winter wheat varieties using DAPC analysis. (A)  
691 The representative variety for each population group (Pop) is indicated except for Pop2  
692 which consists of a more diverse pedigree. (B) Pedigree structure for Pop4 “Robigus”.  
693 The number in the inset represent varieties: (1) Qplus (2) Torch (3) Viscount (4)  
694 Conqueror (5) Leeds (6) Lear (7) Zulu (8) Gravitas (9) Twister (10) Britannia (11) Invicta  
695 (12) Warrior (13) Cougar (14) KWS Croft (15) KWS Target (16) Oakley (17) Jorvik (18)  
696 Panacea (19) Tuxedo (20) Icon (21) Horatio (22) KWS Gator (23) KWS Santiago (24)  
697 RGT Scrummage (25) Reflection (26) Energise (27) KWS Kerrin. The population groups



698 are represented by teal (Pop1), yellow (Pop2), purple (Pop3), and red (Pop4) circles,  
699 whereas gray circles represent varieties which were not genotyped in this study.

700 **Figure 7:** (A) Manhattan plot for days to ripening using EVM derived from the 2002 –  
701 2017 NVPT of UK winter wheat varieties. The Bonferroni threshold is indicated with a  
702 dotted line. The seven wheat chromosome groups are indicated on the X-axis and each  
703 homoeologous sub-genome is coloured in red (A genome), gray (B) or yellow (D). (B)  
704 QQplot showing expected and observed distribution of  $-\log(p \text{ values})$ . (C) Allele effect  
705 of the marker showing the highest significant marker trait association for days to  
706 ripening.

707 **Figure 8:** Yield comparison between treated and untreated trials before and after the  
708 emergence of the “warrior” yellow rust race. Scatter plot showing changes in yield in  
709 treated (light blue) and untreated trials (dark blue) before (unshaded region) and after  
710 (shaded region) the emergence of the “warrior” yellow rust race. The EVM for each  
711 period are regressed separately against the first year of entry into the NVPT trials for  
712 each variety. The solid lines are the regression lines. The regression equations are  
713 shown at the bottom corners of the plot.

714

715

716

717

718

719  
720  
721  
722  
723 TABLE 1: NUMBER OF VARIETIES, SITES, AND YEARS OF TRIALS FOR THE UK NVPT BETWEEN  
724 2002-2017

| <b>Trait</b>     | <b>Varieties<sup>*</sup></b> | <b>Trial Locations<sup>**</sup></b> | <b>Trial Years</b> | <b>Year x Location Combinations</b> | <b>Total Observations</b> |
|------------------|------------------------------|-------------------------------------|--------------------|-------------------------------------|---------------------------|
| Treated yield    | 133                          | 158                                 | 15                 | 410                                 | 13080                     |
| Untreated yield  | 131                          | 53                                  | 15                 | 124                                 | 4156                      |
| Protein content  | 128                          | 99                                  | 15                 | 230                                 | 7142                      |
| Days to ripening | 133                          | 108                                 | 15                 | 247                                 | 7977                      |
| HFN              | 128                          | 99                                  | 15                 | 227                                 | 7154                      |
| Specific weight  | 129                          | 99                                  | 15                 | 231                                 | 7091                      |
| Treated height   | 108                          | 74                                  | 11                 | 171                                 | 3905                      |
| Untreated height | 107                          | 30                                  | 11                 | 75                                  | 1647                      |

725 <sup>\*</sup>Not all varieties were tested for each trait, and in each year and location.

726 <sup>\*\*</sup>Some locations were used in more than one year.

727



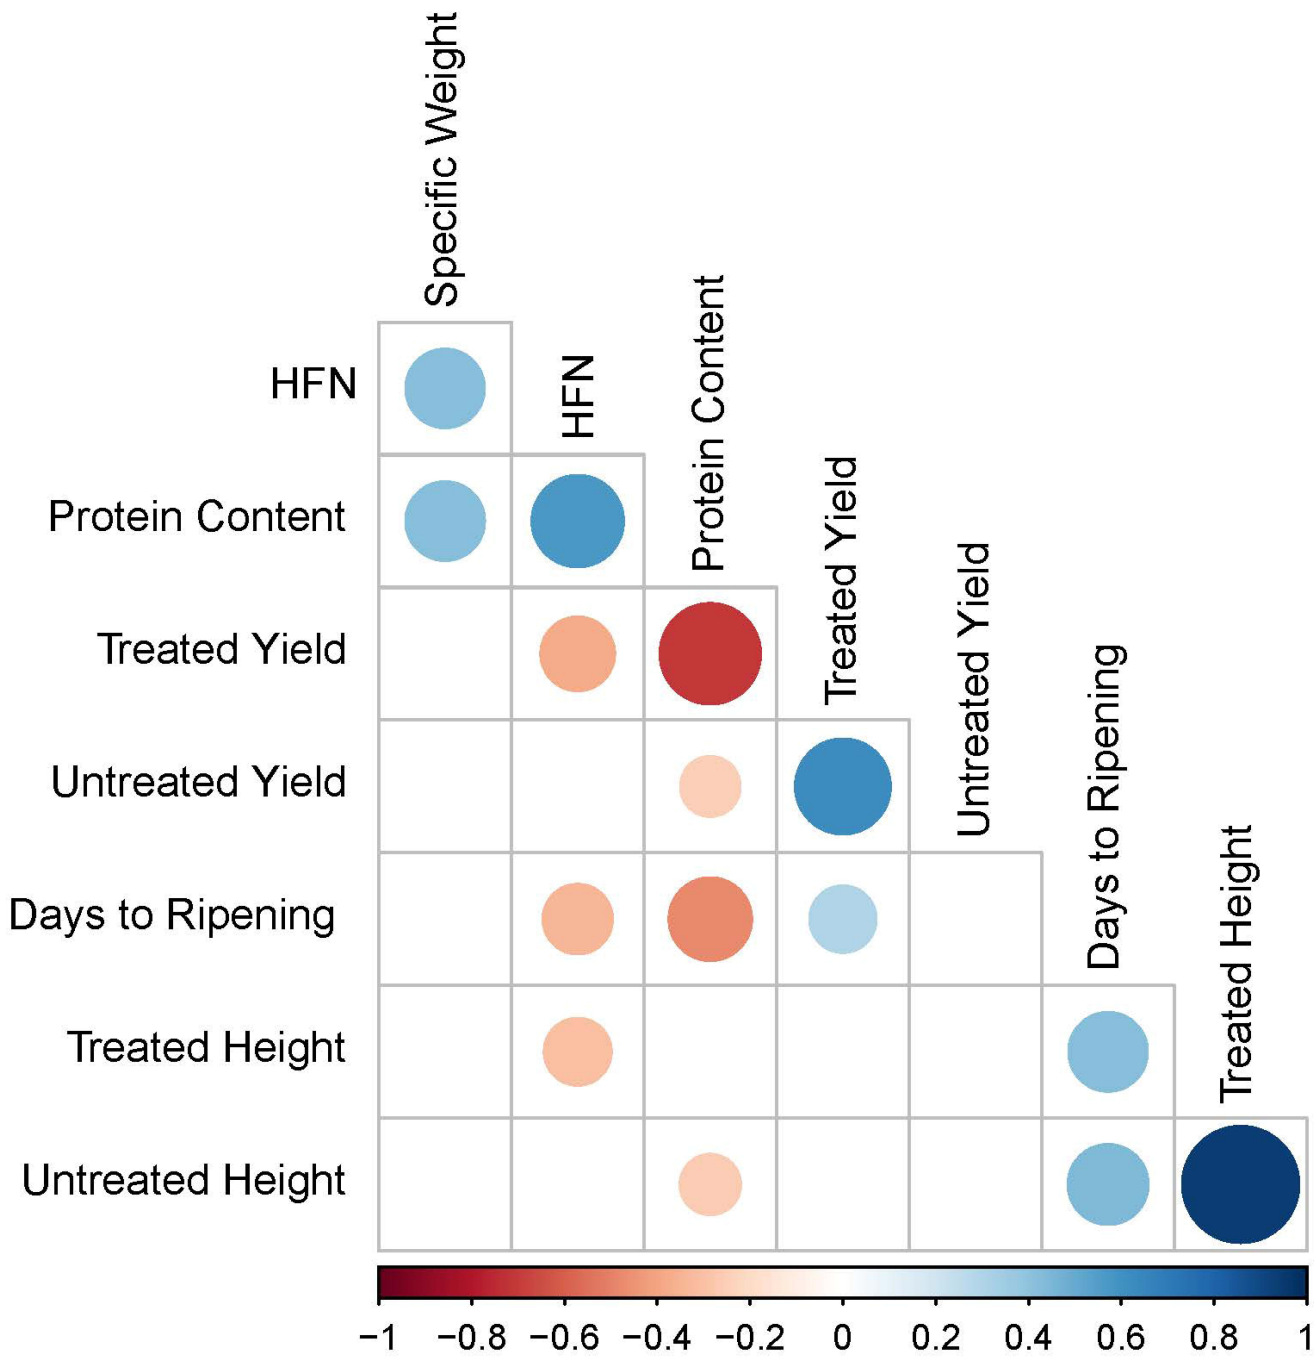

**A**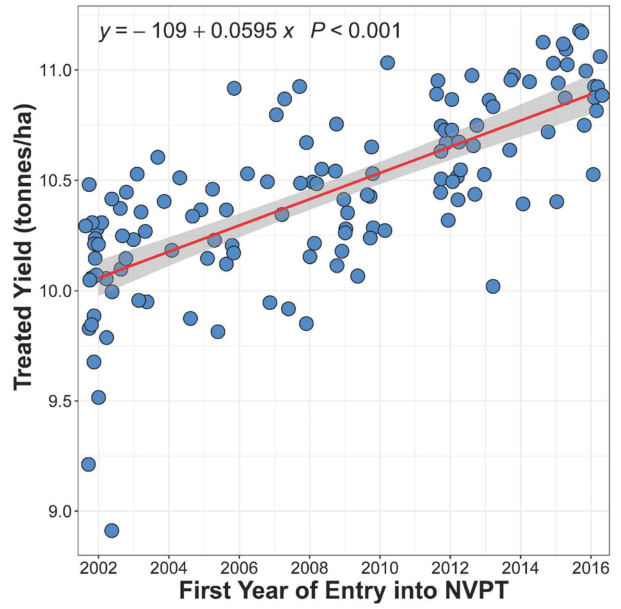**B**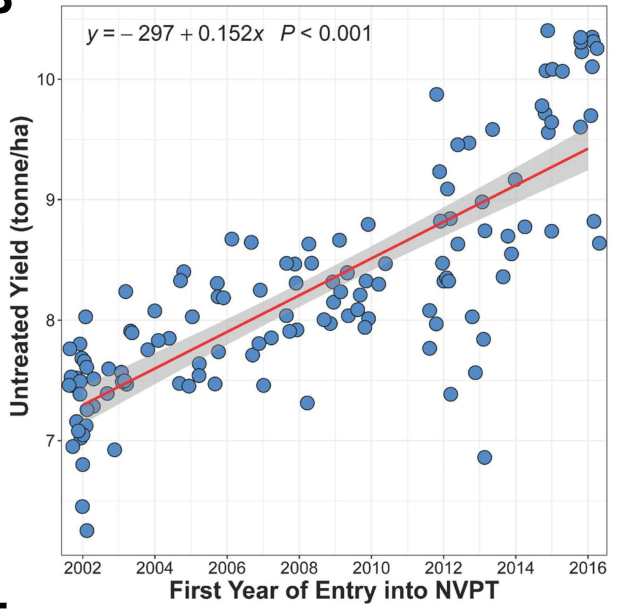**C**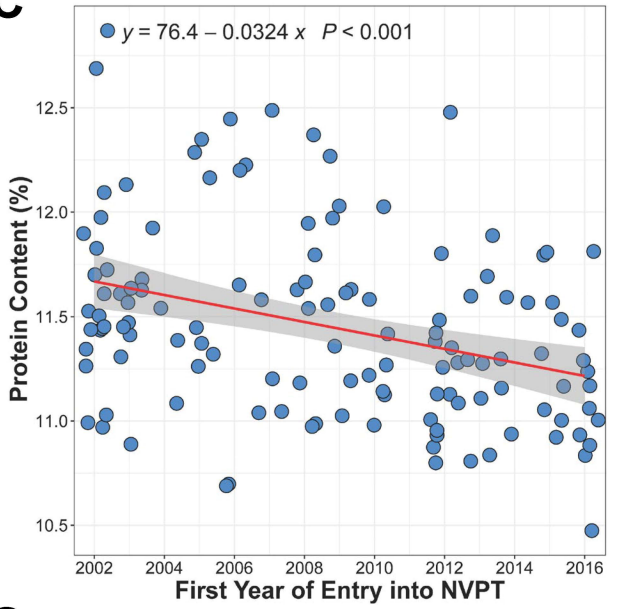**D**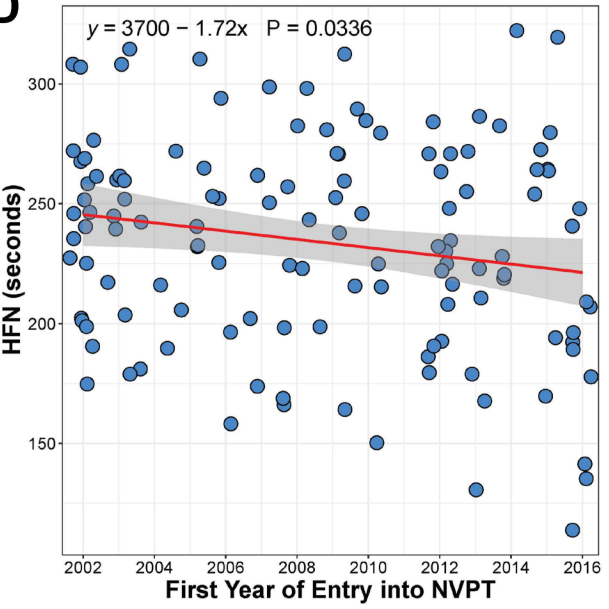**E**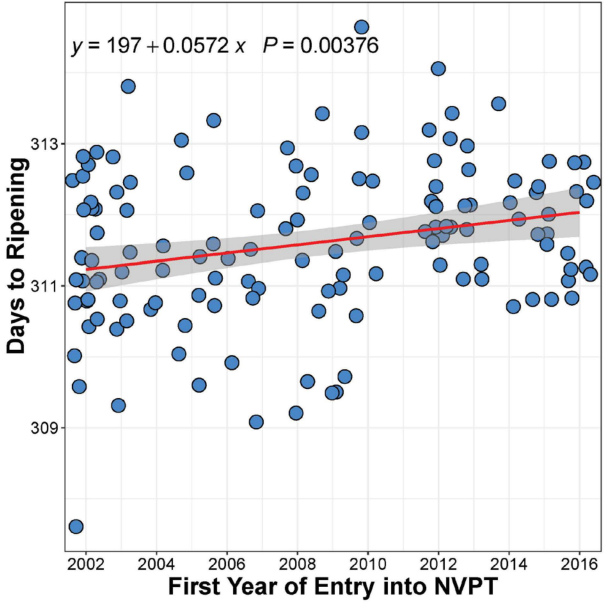**F**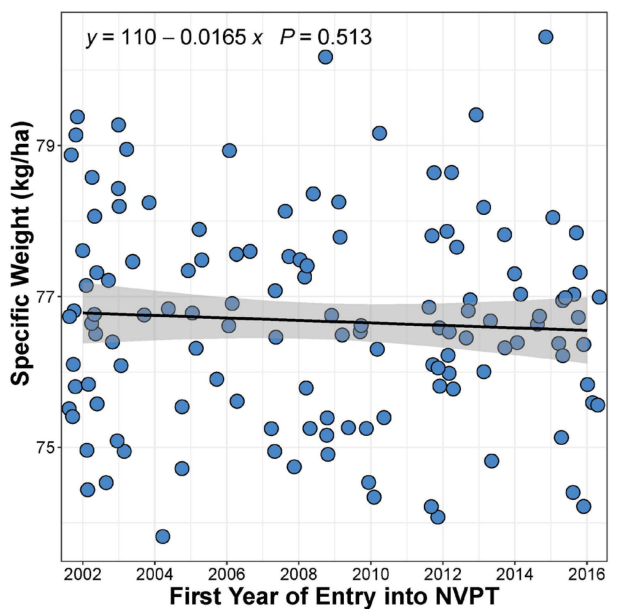**G**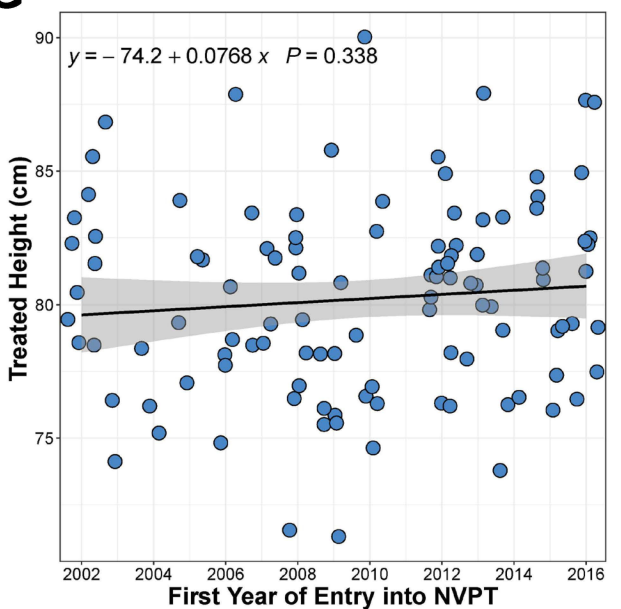**H**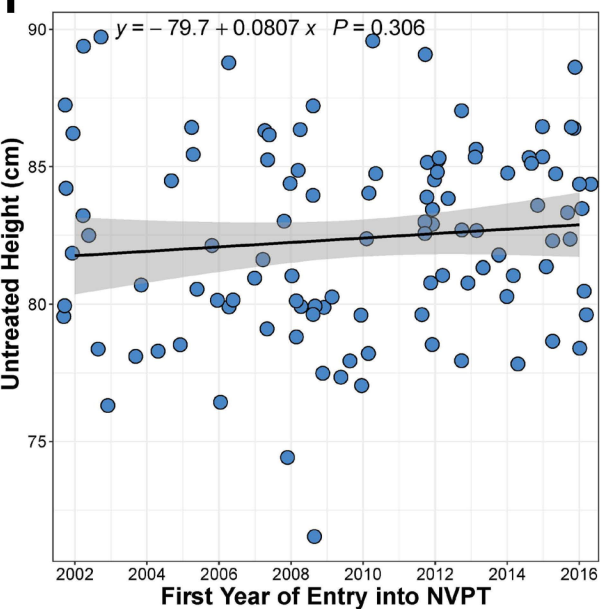

**A**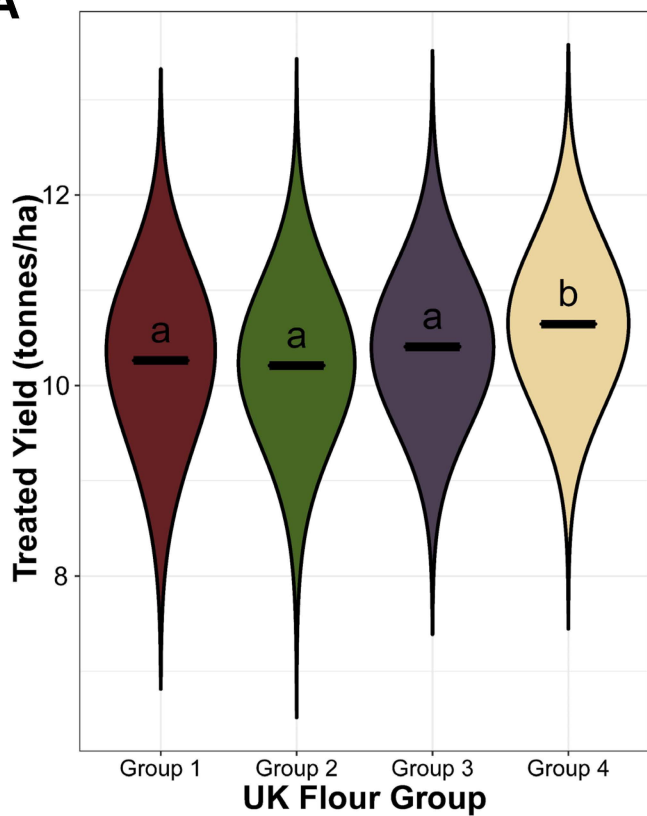**B**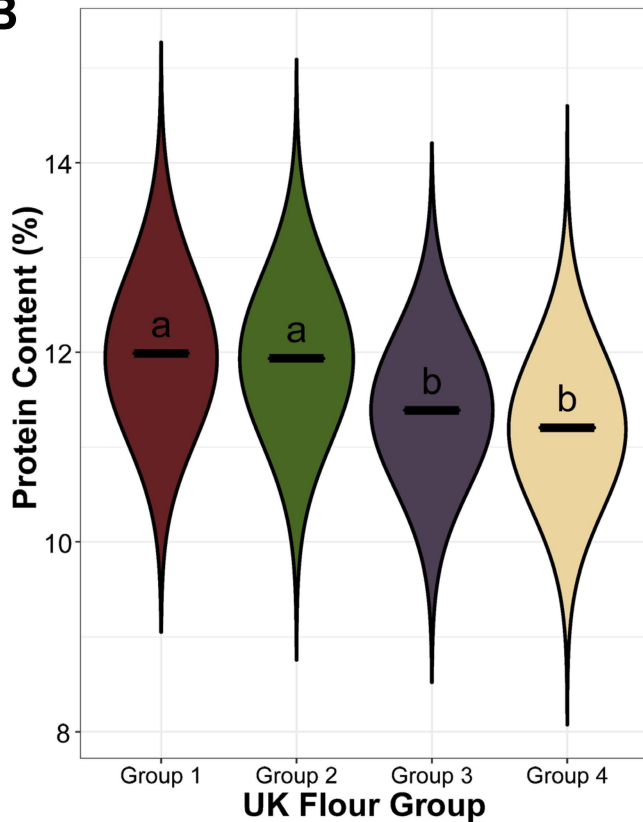**C**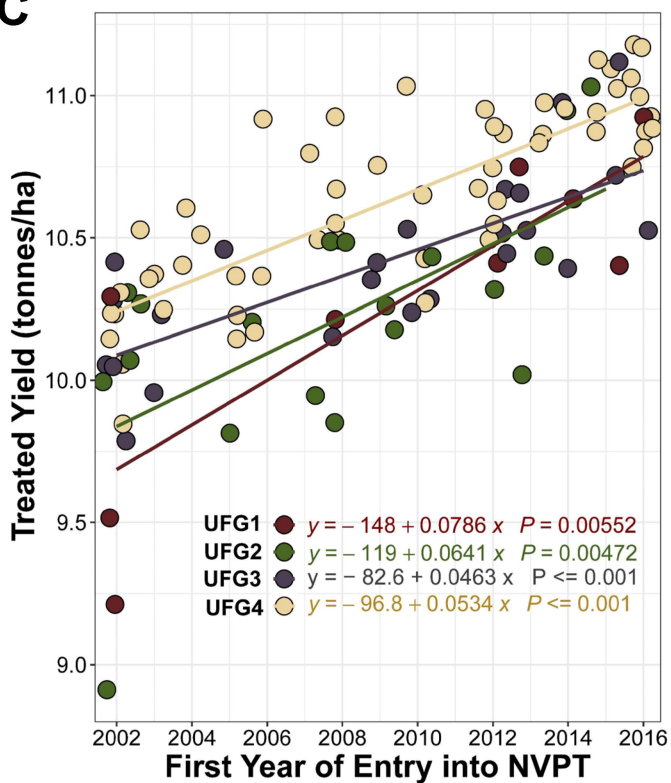**D**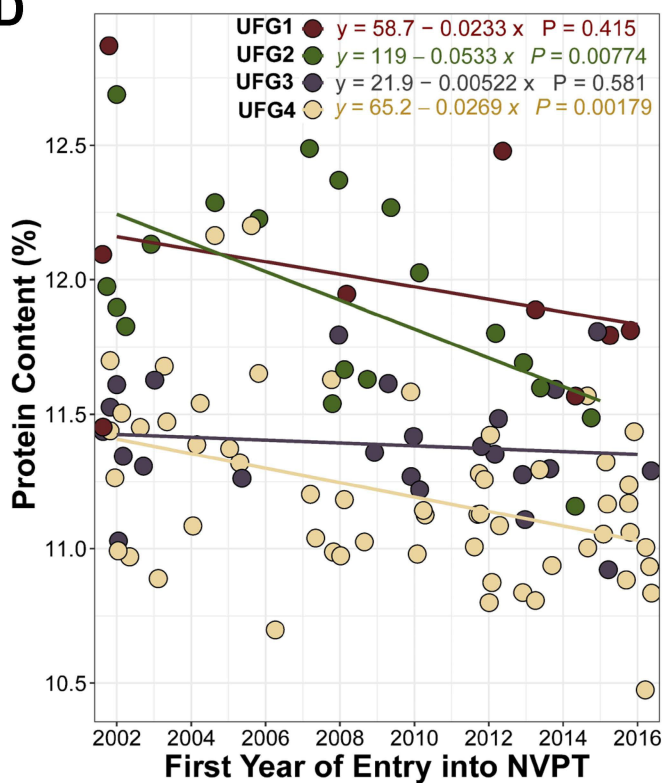

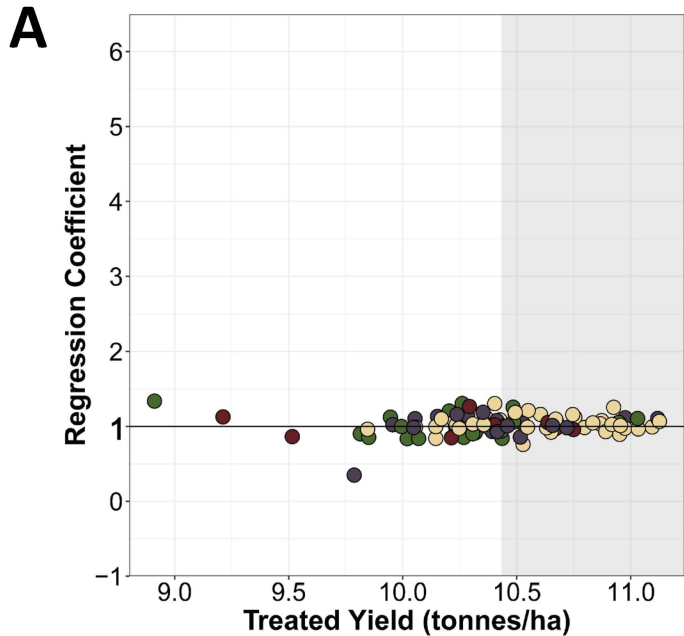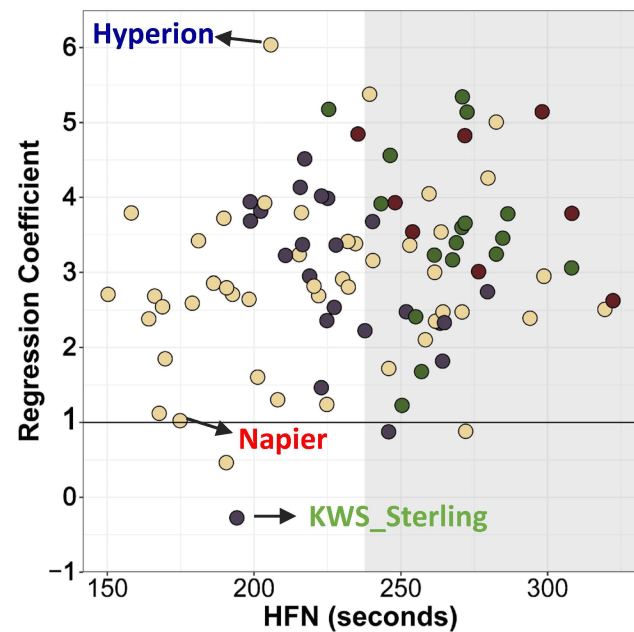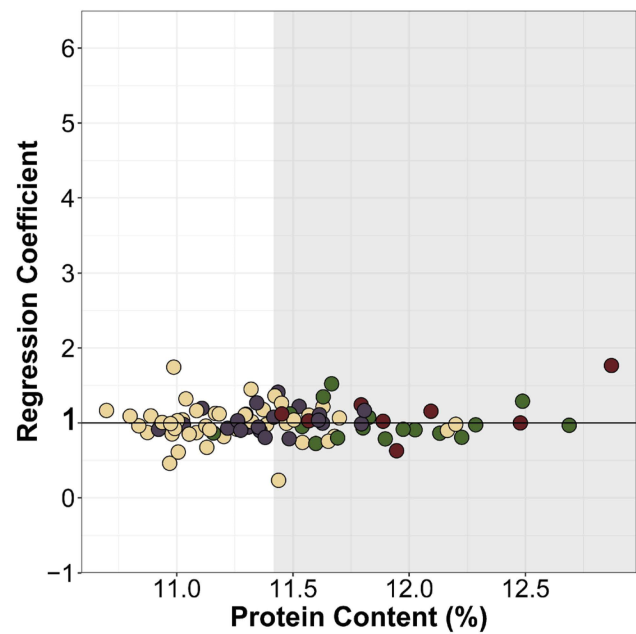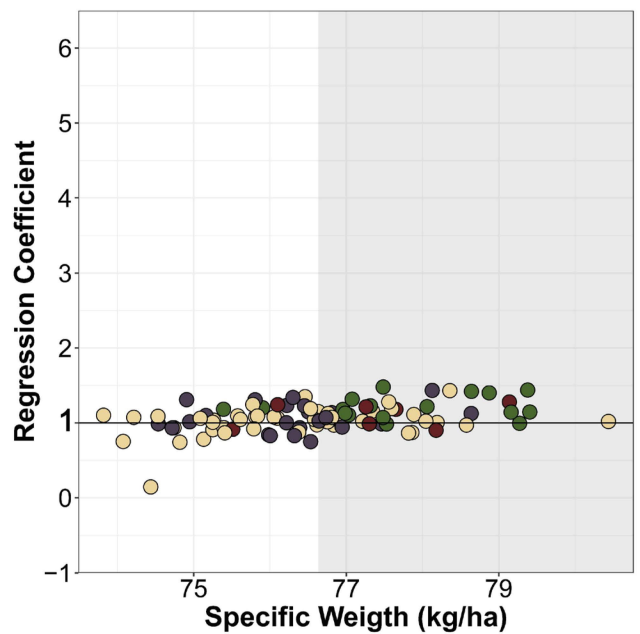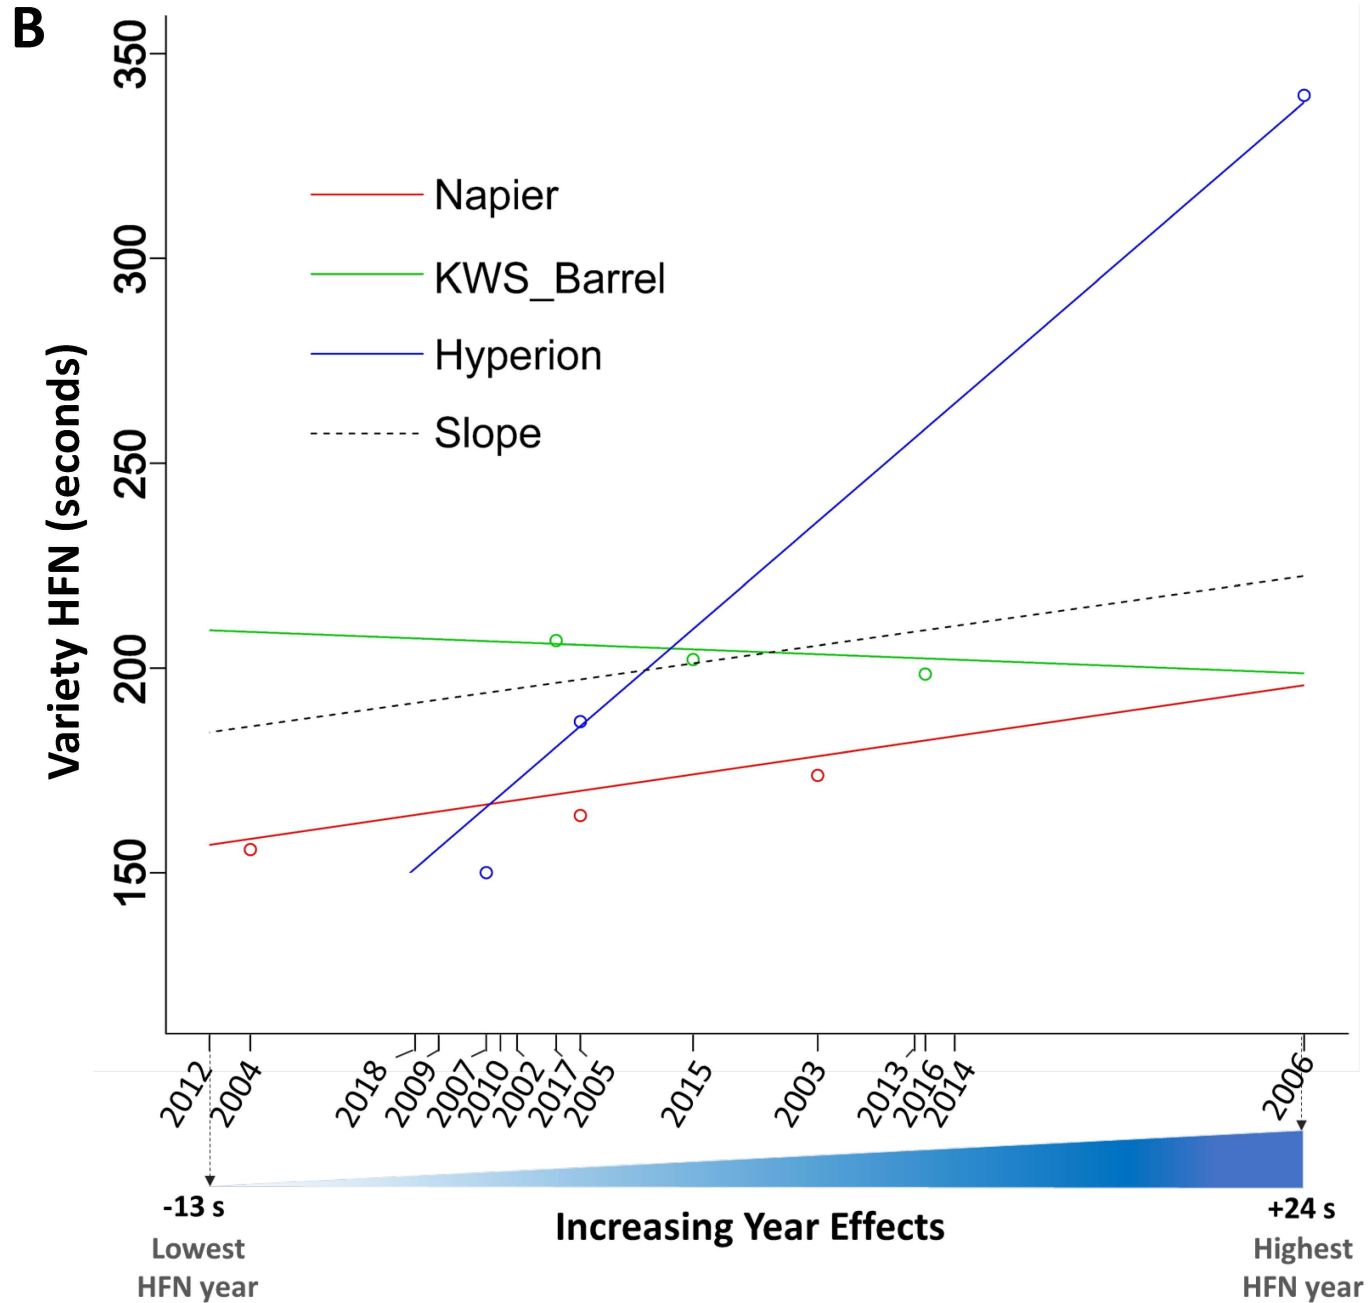

**A**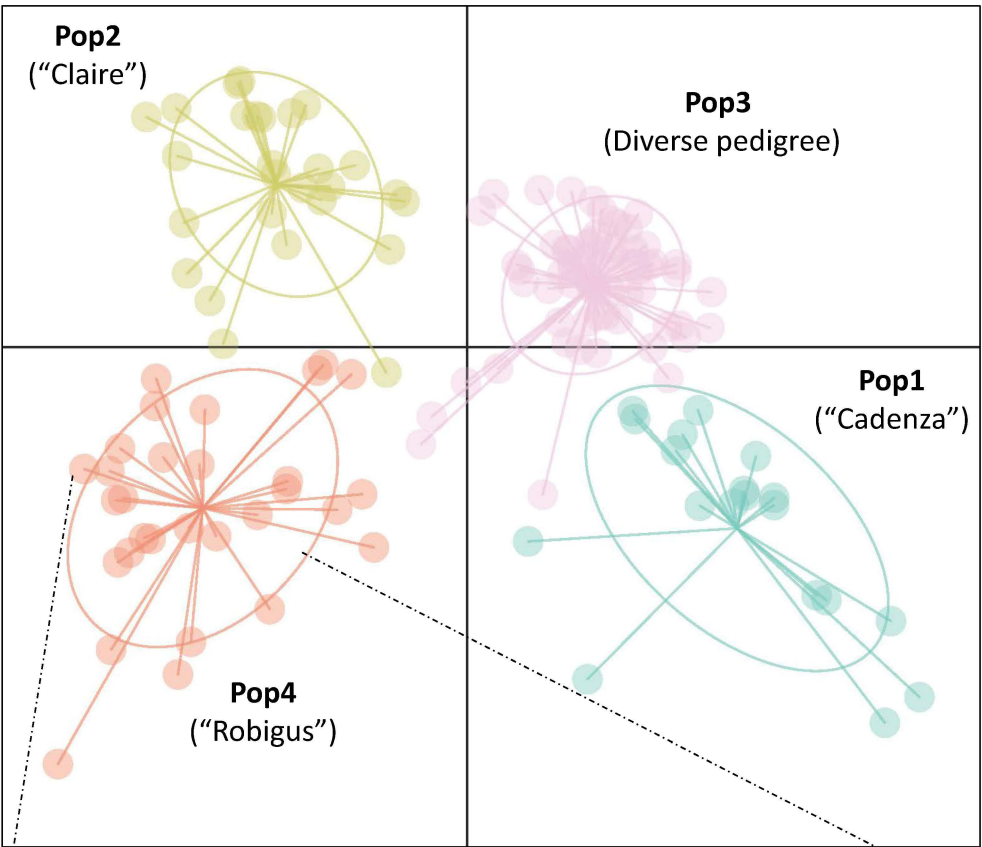**B**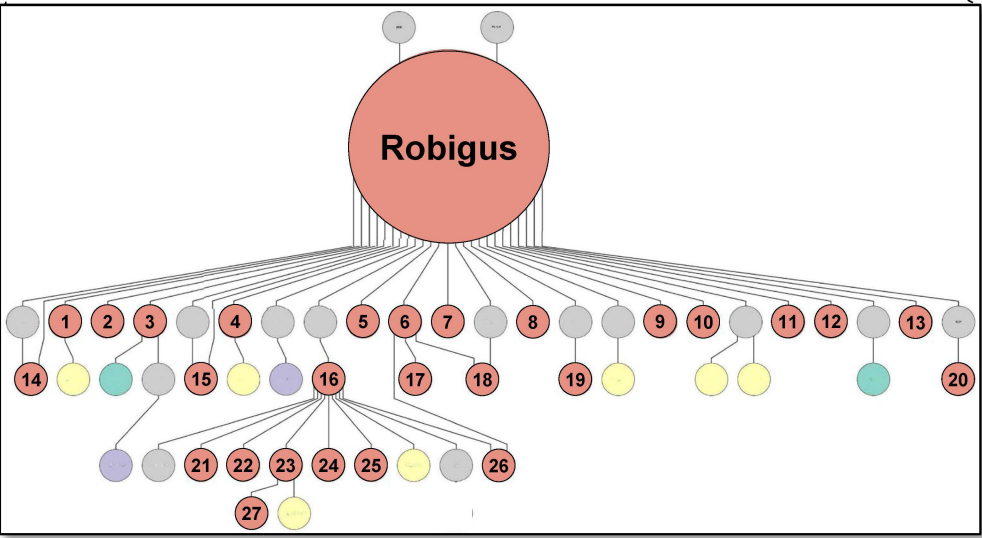



**A**

Genome ● A ● B ● D

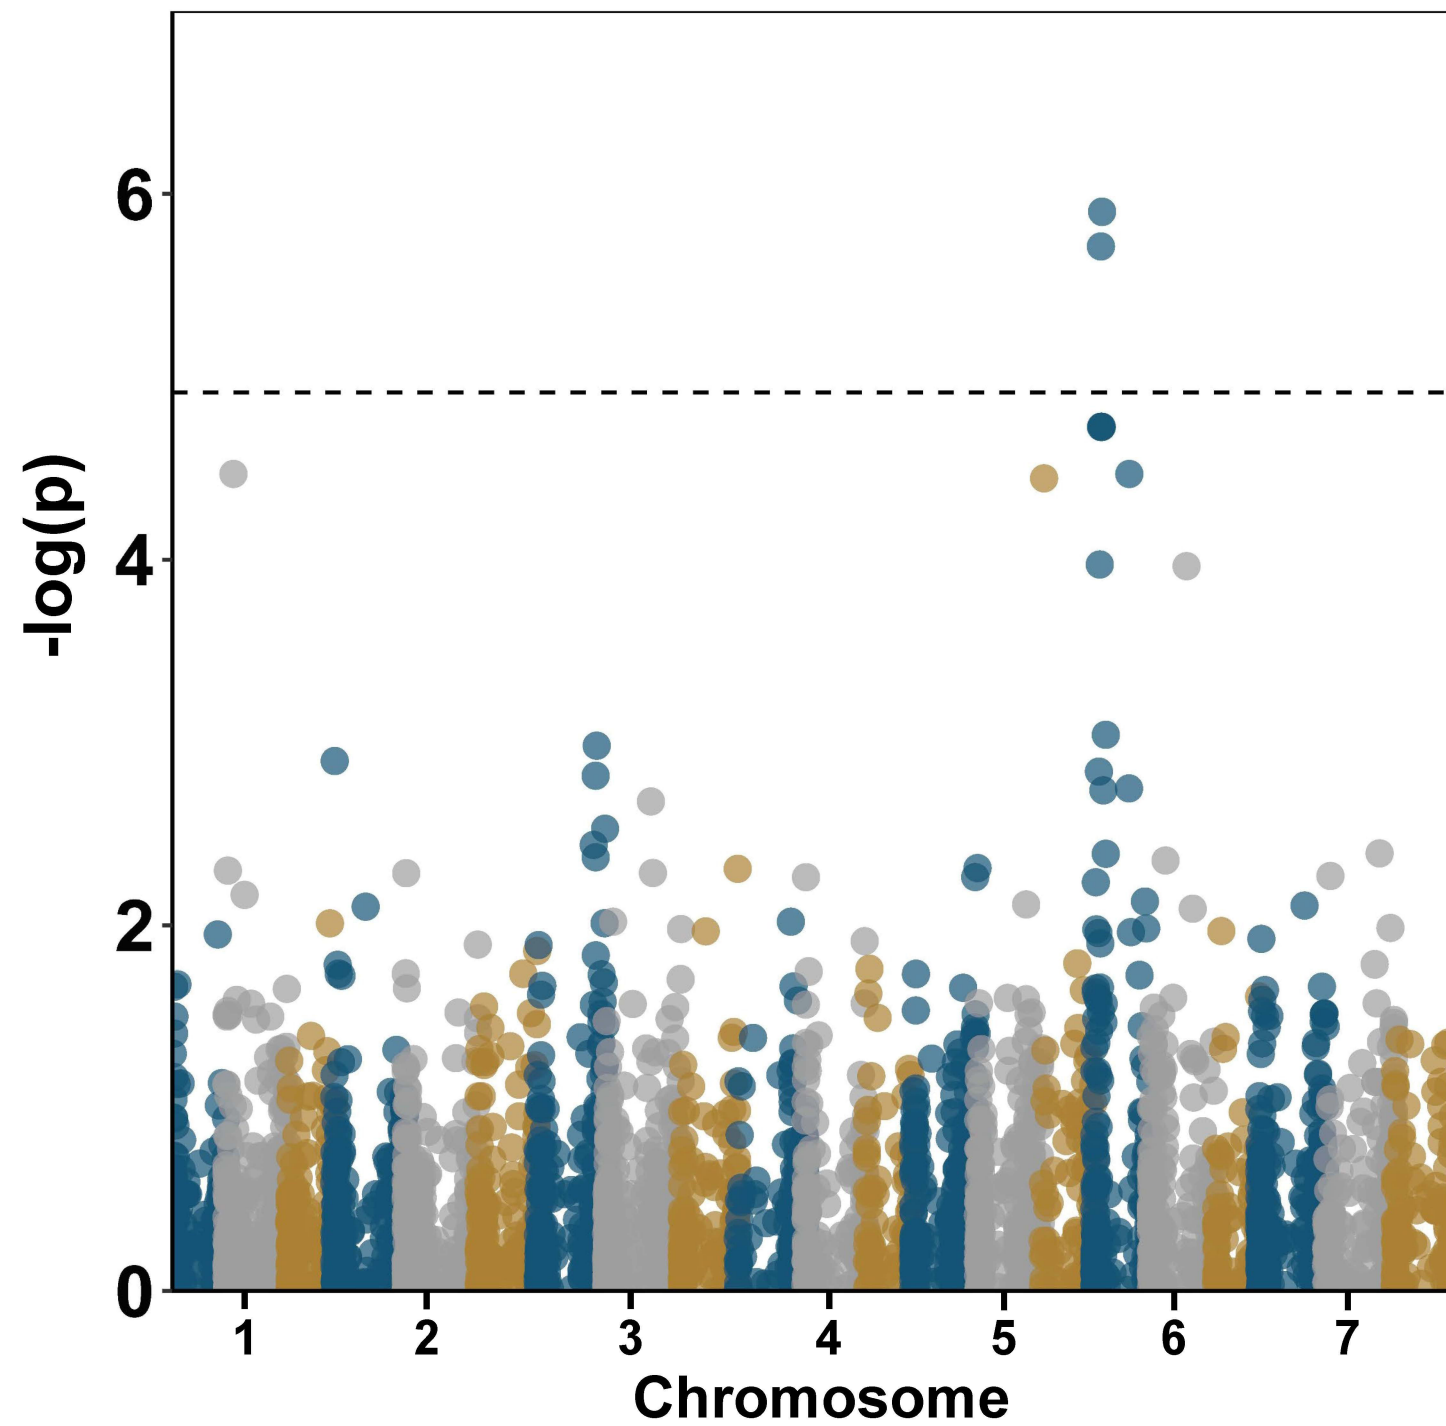**B**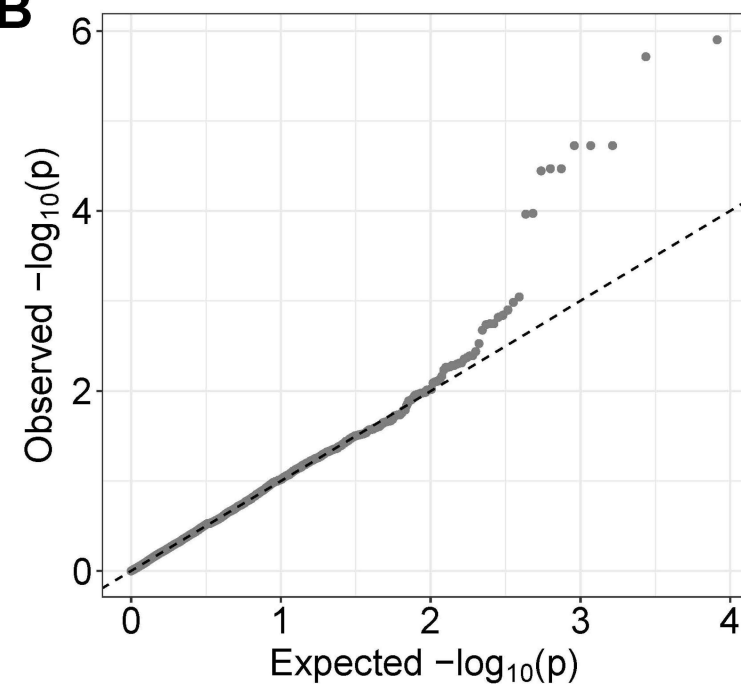**C**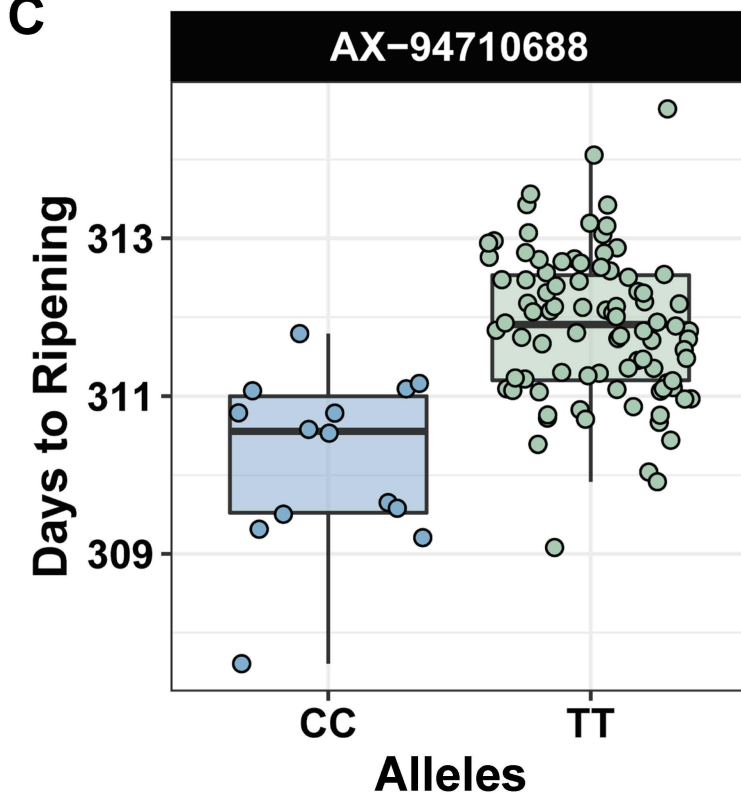

○ Treated Yield      ● Untreated Yield

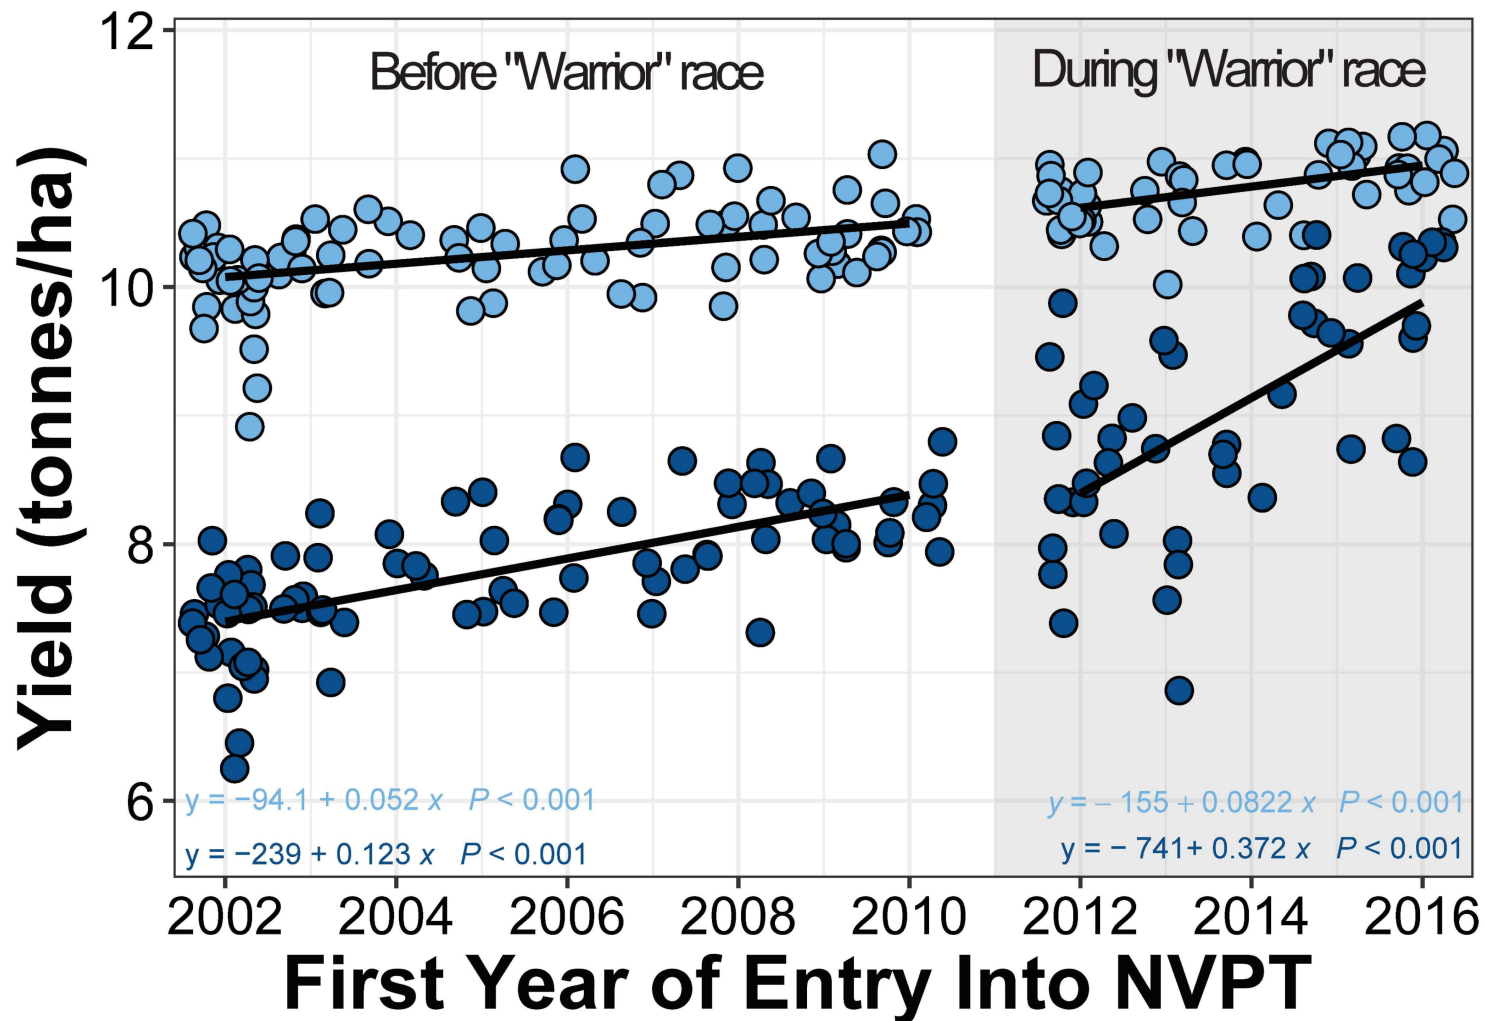

Source: https://www.biorxiv.org/content/biorxiv/early/2021/05/18/2021.05.17.444481.full.pdf
